# Supplementary material for: Impact of Anemia Severity on the Outcome of an Aneurysmal Subarachnoid Hemorrhage
Source: MDPI journal article supplement (doi:10.3390/jcm11216258), 2022-10-24
Supplement: s1 [file s1]

## SUPPLEMENTARY MATERIALS

**Supplementary Table S1:** Univariate analysis on the association between different nHb values and potential prognostic factors.

| Variable \ Nadir Hb                             | <7.0 g/dL            |         | <8.0 g/dL                          |                   | <9.0 g/dL                         |                   | <10.0 g/dL                         |                   | <11.0 g/dL                         |                   |
|-------------------------------------------------|----------------------|---------|------------------------------------|-------------------|-----------------------------------|-------------------|------------------------------------|-------------------|------------------------------------|-------------------|
|                                                 | OR (95% CI)          | p-value | OR (95% CI)                        | p-value           | OR (95% CI)                       | p-value           | OR (95% CI)                        | p-value           | OR (95% CI)                        | p-value           |
| <i>Demographic parameters and comorbidities</i> |                      |         |                                    |                   |                                   |                   |                                    |                   |                                    |                   |
| Age ≥55 years                                   | 1.95<br>(0.90-4.19)  | 0.09    | <b>1.81</b><br><b>(1.18-2.79)</b>  | <b>0.007</b>      | <b>1.87</b><br><b>(1.36-2.57)</b> | <b>&lt;0.0001</b> | <b>1.42</b><br><b>(1.01-1.98)</b>  | <b>0.042</b>      | 1.36<br>(0.89-2.07)                | 0.168             |
| Female sex                                      | 0.85<br>(0.40-1.84)  | 0.692   | 0.86<br>(0.56-1.34)                | 0.498             | 1.11<br>(0.80-1.55)               | 0.554             | <b>1.54</b><br><b>(1.09-2.17)</b>  | <b>0.016</b>      | <b>2.36</b><br><b>(1.55-3.60)</b>  | <b>&lt;0.0001</b> |
| Ethnicity<br>(non-Caucasian)                    | 0.77<br>(0.10-5.89)  | 1.000   | 1.47<br>(0.58-3.71)                | 0.427             | 1.27<br>(0.60-2.72)               | 0.559             | 1.79<br>(0.72-4.49)                | 0.301             | 1.71<br>(0.51-5.76)                | 0.603             |
| Hypertension                                    | 1.59<br>(0.64-3.98)  | 0.404   | <b>1.82</b><br><b>(1.08-3.07)</b>  | <b>0.024</b>      | <b>1.45</b><br><b>(1.02-2.07)</b> | <b>0.042</b>      | 1.33<br>(0.93-1.91)                | 0.135             | 1.07<br>(0.68-1.69)                | 0.815             |
| Hypercholesterolemia                            | 1.27<br>(0.37-4.36)  | 0.727   | 1.59<br>(0.80-3.14)                | 0.176             | 1.34<br>(0.76-2.36)               | 0.310             | <b>2.51</b><br><b>(1.20-5.24)</b>  | <b>0.013</b>      | 2.03<br>(0.79-5.23)                | 0.178             |
| Hypothyroidism                                  | 1.59<br>(0.59-4.29)  | 0.398   | 1.10<br>(0.58-2.09)                | 1.000             | 1.06<br>(0.66-1.73)               | 0.904             | 1.62<br>(0.93-2.83)                | 0.205             | 1.37<br>(0.68-2.76)                | 1.000             |
| Hyperthyroidism                                 | 1.87<br>(0.10-34.63) | 1.000   | 0.47<br>(0.03-8.63)                | 1.000             | 2.19<br>(0.36-13.21)              | 0.403             | 1.92<br>(0.21-17.29)               | 1.000             | 2.24<br>(0.12-40.79)               | 0.596             |
| Hyperuricemia                                   | 2.71<br>(0.59-12.40) | 0.198   | 2.05<br>(0.71-5.87)                | 0.190             | 1.87<br>(0.73-4.79)               | 0.226             | 1.26<br>(0.44-3.58)                | 0.801             | 1.64<br>(0.37-7.22)                | 0.751             |
| Diabetes mellitus                               | 1.18<br>(0.27-5.16)  | 0.689   | 1.20 (0.51-2.81)                   | 0.649             | 1.49<br>(0.77-2.87)               | 0.238             | <b>4.31</b><br><b>(1.51-12.33)</b> | <b>0.002</b>      | <b>7.85</b><br><b>(1.07-57.84)</b> | <b>0.012</b>      |
| Renal diseases                                  | 0.38<br>(0.02-6.47)  | 0.622   | 1.32<br>(0.48-3.58)                | 0.580             | 0.98<br>(0.43-2.21)               | 1.000             | 0.85<br>(0.37-1.96)                | 0.670             | 0.80<br>(0.29-2.18)                | 0.592             |
| <i>Regular medication</i>                       |                      |         |                                    |                   |                                   |                   |                                    |                   |                                    |                   |
| Statins                                         | 1.38<br>(0.31-6.05)  | 0.658   | 1.68<br>(0.74-3.80)                | 0.228             | 1.24<br>(0.63-2.47)               | 0.596             | <b>2.99</b><br><b>(1.14-7.83)</b>  | <b>0.024</b>      | 2.17<br>(0.65-7.22)                | 0.246             |
| Painkiller abuse                                | 0.43<br>(0.06-3.24)  | 0.715   | 0.60<br>(0.23-1.57)                | 0.408             | 1.0<br>(0.55-1.83)                | 1.000             | 0.63<br>(0.34-1.15)                | 0.145             | 0.73<br>(0.35-1.52)                | 0.417             |
| Blood thinners                                  | 2.28<br>(0.84-6.24)  | 0.166   | 1.49<br>(0.76-2.94)                | 0.252             | 1.39<br>(0.80-2.41)               | 0.257             | 1.84<br>(0.95-3.57)                | 0.073             | 1.75<br>(0.73-4.18)                | 0.262             |
| <i>Initial SAH severity</i>                     |                      |         |                                    |                   |                                   |                   |                                    |                   |                                    |                   |
| WFNS grade (4-5)                                | 2.14<br>(0.99-4.60)  | 0.056   | <b>2.85</b><br><b>(1.83-4.45)</b>  | <b>&lt;0.0001</b> | <b>3.03</b><br><b>(2.19-4.21)</b> | <b>&lt;0.0001</b> | <b>3.18</b><br><b>(2.21-4.57)</b>  | <b>&lt;0.0001</b> | <b>3.27</b><br><b>(2.01-5.31)</b>  | <b>&lt;0.0001</b> |
| Fisher grade (3-4)                              | 7.91<br>(0.48-131.0) | 0.063   | <b>4.76</b><br><b>(1.46-15.46)</b> | <b>0.003</b>      | <b>2.58</b><br><b>(1.44-4.64)</b> | <b>&lt;0.0001</b> | <b>1.87</b><br><b>(1.12-3.15)</b>  | <b>0.024</b>      | <b>2.14</b><br><b>(1.17-3.91)</b>  | <b>0.018</b>      |
| Acute hydrocephalus                             | 2.0<br>(0.68-5.83)   | 0.265   | <b>3.30</b><br><b>(1.67-6.51)</b>  | <b>&lt;0.0001</b> | <b>3.02</b><br><b>(1.98-4.60)</b> | <b>&lt;0.0001</b> | <b>2.83</b><br><b>(1.94-4.12)</b>  | <b>&lt;0.0001</b> | <b>2.75</b><br><b>(1.77-4.26)</b>  | <b>&lt;0.0001</b> |
| Aneurysm size ≥7mm                              | 1.54<br>(0.72-3.32)  | 0.333   | 1.22<br>(0.80-1.87)                | 0.383             | 1.15<br>(0.83-1.58)               | 0.417             | 1.14<br>(0.81-1.59)                | 0.496             | 1.24<br>(0.81-1.89)                | 0.338             |

| <i>Clinical events and complications during SAH</i> |                     |       |                                   |                              |                                   |                   |                                   |                              |                                    |                   |
|-----------------------------------------------------|---------------------|-------|-----------------------------------|------------------------------|-----------------------------------|-------------------|-----------------------------------|------------------------------|------------------------------------|-------------------|
| Aneurysm rebleed                                    | 2.3<br>(0.66-8.04)  | 0.174 | 1.54<br>(0.65-3.66)               | 0.321                        | 1.31<br>(0.64-2.67)               | 0.465             | 2.15<br>(0.87-5.30)               | 0.120                        | 1.99<br>(0.59-6.65)                | 0.335             |
| Vasospasm                                           | 1.63<br>(0.75-3.51) | 0.210 | 1.44<br>(0.92-2.27)               | 0.118                        | <b>1.74</b><br><b>(1.23-2.47)</b> | <b>0.002</b>      | <b>2.78</b><br><b>(1.82-4.26)</b> | <b>&lt;0.000</b><br><b>1</b> | <b>3.58</b><br><b>(1.91-6.71)</b>  | <b>&lt;0.0001</b> |
| DC                                                  | 1.64<br>(0.77-3.50) | 0.218 | <b>2.71</b><br><b>(1.76-4.18)</b> | <b>&lt;0.00</b><br><b>01</b> | <b>3.09</b><br><b>(2.18-4.37)</b> | <b>&lt;0.0001</b> | <b>5.32</b><br><b>(3.31-8.55)</b> | <b>&lt;0.000</b><br><b>1</b> | <b>7.85</b><br><b>(3.57-17.24)</b> | <b>&lt;0.0001</b> |
| ACS                                                 | 1.36<br>(0.17-10.7) | 0.543 | <b>3.0</b><br><b>(1.08-8.35)</b>  | <b>0.039</b>                 | 2.14<br>(0.80-5.71)               | 0.137             | 2.33<br>(0.66-8.20)               | 0.202                        | 1.46<br>(0.33-6.49)                | 1.000             |
| Systemic infection                                  | 0.91<br>(0.42-1.97) | 0.848 | <b>1.71</b><br><b>(1.11-2.63)</b> | <b>0.02</b>                  | <b>2.28</b><br><b>(1.63-3.18)</b> | <b>&lt;0.0001</b> | <b>3.23</b><br><b>(2.20-4.75)</b> | <b>&lt;0.000</b><br><b>1</b> | <b>3.92</b><br><b>(2.27-6.77)</b>  | <b>&lt;0.0001</b> |
| Clipping                                            | 0.64<br>(0.29-1.42) | 0.335 | <b>1.79</b><br><b>(1.17-2.73)</b> | <b>0.008</b>                 | <b>2.44</b><br><b>(1.76-3.37)</b> | <b>&lt;0.0001</b> | <b>4.22</b><br><b>(2.86-6.24)</b> | <b>&lt;0.000</b><br><b>1</b> | <b>6.99</b><br><b>(3.75-13.05)</b> | <b>&lt;0.0001</b> |

Abbreviations: Hb=hemoglobin, OR= odds ratio, CI= confidence interval, WFNS= World Federation of Neurosurgical Societies, DC= decompressive craniectomy, ACS= acute coronary syndrome. Significant results are in bold.

**Supplementary Table S2:** Multivariate analysis with the M1 (adjusted for baseline characteristics) and M2 models on the association between different nHb values and the major outcome endpoints of the study.

| Nadir Hb:                              |        | <7.0 g/dL             |         | <8.0 g/dL                           |                   | <9.0 g/dL                           |                   | <10.0 g/dL                           |                   | <11.0 g/dL                           |                   |
|----------------------------------------|--------|-----------------------|---------|-------------------------------------|-------------------|-------------------------------------|-------------------|--------------------------------------|-------------------|--------------------------------------|-------------------|
|                                        |        | OR (95% CI)           | p-value | OR (95% CI)                         | p-value           | OR (95% CI)                         | p-value           | OR (95% CI)                          | p-value           | OR (95% CI)                          | p-value           |
| <i>Cerebral infarctions</i>            | MVA M1 | 1.29<br>(0.58 - 2.87) | 0.530   | 1.54<br>(0.96 - 2.46)               | 0.073             | <b>1.72</b><br><b>(1.21 - 2.46)</b> | <b>0.003</b>      | <b>2.47</b><br><b>(1.66 - 3.68)</b>  | <b>&lt;0.0001</b> | <b>2.30</b><br><b>(1.38 - 3.84)</b>  | <b>0.001</b>      |
|                                        | MVA M2 | 1.28<br>(0.56 - 2.96) | 0.557   | 1.33<br>(0.82 - 2.17)               | 0.249             | <b>1.70</b><br><b>(1.16 - 2.50)</b> | <b>0.007</b>      | <b>1.83</b><br><b>(1.19 - 2.81)</b>  | <b>0.006</b>      | 1.67<br>(0.98 - 2.86)                | 0.062             |
| <i>Unfavorable outcome at 6 months</i> | MVA M1 | 1.98<br>(0.80 - 4.92) | 0.142   | <b>2.85</b><br><b>(1.65 - 4.92)</b> | <b>&lt;0.0001</b> | <b>3.05</b><br><b>(2.04 - 4.56)</b> | <b>&lt;0.0001</b> | <b>2.19</b><br><b>(1.39 - 3.46)</b>  | <b>0.001</b>      | <b>2.17</b><br><b>(1.18 - 3.98)</b>  | <b>0.013</b>      |
|                                        | MVA M2 | 1.98<br>(0.74 - 5.34) | 0.176   | <b>2.21</b><br><b>(1.21 - 4.04)</b> | <b>0.010</b>      | <b>2.44</b><br><b>(1.57 - 3.79)</b> | <b>&lt;0.0001</b> | 1.50<br>(0.89 - 2.52)                | 0.126             | 1.43<br>(0.75 - 2.72)                | 0.280             |
| <i>In-hospital mortality</i>           | MVA M1 | 2.43<br>(0.64 - 9.21) | 0.193   | <b>3.32</b><br><b>(1.62 - 7.23)</b> | <b>0.003</b>      | <b>4.84</b><br><b>(2.49 - 9.41)</b> | <b>&lt;0.0001</b> | <b>9.61</b><br><b>(4.08 - 22.62)</b> | <b>&lt;0.0001</b> | <b>7.41</b><br><b>(2.74 - 20.04)</b> | <b>&lt;0.0001</b> |
|                                        | MVA M2 | 2.20<br>(0.50 - 9.68) | 0.298   | <b>2.44</b><br><b>(1.07 - 5.55)</b> | <b>0.034</b>      | <b>3.22</b><br><b>(1.59 - 6.51)</b> | <b>0.001</b>      | <b>6.06</b><br><b>(2.39 - 15.34)</b> | <b>&lt;0.0001</b> | <b>4.60</b><br><b>(1.61 - 13.14)</b> | <b>0.004</b>      |

Abbreviations: OR= odds ratio, CI= confidence interval. Significant findings are in bold.

**Supplementary Table S3:** Analysis of the association between the timing of outcome-relevant nHb <9.0 g/dL and the major study endpoints.

| nHb < 9.0 g/dL                          |     | Begin         |                  |              | Duration    |          |              |
|-----------------------------------------|-----|---------------|------------------|--------------|-------------|----------|--------------|
|                                         |     | Median (days) | 95% CI           | p-value      | Mean (days) | SD       | p-value      |
|                                         |     |               |                  |              |             |          |              |
| <i>Cerebral infarctions</i>             | yes | 6             | 4.58-7.00        | 0.504        | 4           | 4        | 0.488        |
|                                         | no  | 5             | 4.00-6.67        |              | 5           | 5        |              |
| <i>Unfavourable outcome at 6 months</i> | yes | 5             | 4.00-6.00        | 0.382        | 4           | 5        | 0.662        |
|                                         | no  | 5.4           | 4.00-7.00        |              | 4           | 5        |              |
| <i>In-hospital mortality</i>            | yes | <b>3.9</b>    | <b>2.23-5.00</b> | <b>0.001</b> | <b>3</b>    | <b>3</b> | <b>0.041</b> |
|                                         | no  | <b>6</b>      | <b>5.67-7.60</b> |              | <b>5</b>    | <b>5</b> |              |

Abbreviations: CI = confidence interval, SD = standard deviation. Significant findings are bold.
